# Supplementary material
Source: publisher figshare collection journal article supplement (https://acs.figshare.com/ndownloader/files/34549663)
Supplement: Supplementary file 1 [file 34549663]

## Sheet: Cover page
Profiling how the Gut Microbiome Modulates Host Xenobiotic Metabolism in Response to Benzo[a]pyrene and 1-Nitropyrene Exposure
Whitney L. Garcia,a,b Carson J. Miller,a Gerard X. Lomas,a Kari A. Gaither,a Kimberly J. Tyrrell,a Jordan N. Smith,a,c Kristoffer R. Brandvold,*a,d Aaron T. Wright*a,e
a)Biological Sciences Division, Pacific Northwest National Laboratory, Richland, WA 99352 (USA); *E-mails: kristoffer.brandvold@pnnl.gov; aaron.wright@pnnl.gov
b) Biological Systems Engineering Department, CAHNRS, Washington State University. Pullman, WA 99163 (USA)
c) Department of Environmental and Molecular Toxicology, Oregon State University, Corvallis, OR 97331 (USA)
d) Elson S. Floyd College of Medicine, Washington State University, Spokane, WA 99202 (USA)
e) The Gene and Linda Voiland School of Chemical Engineering and Bioengineering, Washington State University, Pullman, WA 99163 (USA)
Table of contents
Kinetics parameters

## Sheet: Kinetics parameters
			µM	1/min	µmol/L/min			mg/mL	nmol/min/mg	nmol/min/mg	nmol/min/mg
Mouse	Dose	Substrate	Concentration	k	Rate0	Rate0.uci	Rate0.lci	Microsome concentration	Rate0	Rate0.uci	Rate0.lci
Conventional	Water	Benzo[a]Pyrene	0.302525	-0.119063	-0.0360194	-0.0379047	-0.0341965	0.2964	0.121523	0.127884	0.115373
Conventional	Water	Benzo[a]Pyrene	0.566023	-0.0718018	-0.0406415	-0.0467512	-0.033243	0.2964	0.137117	0.15773	0.112156
Conventional	Water	Benzo[a]Pyrene	4.34144	-0.0220144	-0.0955741	-0.140269	-0.054196	0.2964	0.32245	0.473242	0.182847
Conventional	Water	Benzo[a]Pyrene	8.99437	-0.0149538	-0.134496	-0.195644	-0.0974933	0.2964	0.453765	0.660067	0.328925
Conventional	Water	Benzo[a]Pyrene	19.9098	-0.00651119	-0.129637	-0.258015	-0.00862895	0.2964	0.437371	0.870496	0.0291125
Gnotobiotic	Water	Benzo[a]Pyrene	0.392852	-0.0639865	-0.0251372	-0.0509657	-0.00907383	0.2964	0.0848085	0.171949	0.0306135
Gnotobiotic	Water	Benzo[a]Pyrene	0.646372	-0.0624575	-0.0403708	-0.0644768	-0.0274503	0.2964	0.136204	0.217533	0.0926122
Gnotobiotic	Water	Benzo[a]Pyrene	4.37541	-0.035986	-0.157453	-0.233702	-0.104613	0.2964	0.53122	0.788467	0.352946
Gnotobiotic	Water	Benzo[a]Pyrene	10.5767	-0.0436815	-0.462007	-0.511164	-0.410616	0.2964	1.55873	1.72457	1.38534
Gnotobiotic	Water	Benzo[a]Pyrene	20.7101	-0.0309338	-0.640642	-0.836577	-0.493516	0.2964	2.16141	2.82246	1.66503
Conventional	Water	1-Nitropyrene	0.370313	-0.0203157	-0.00752318	-0.0095874	-0.00564647	0.2964	0.0253819	0.0323462	0.0190502
Conventional	Water	1-Nitropyrene	0.595822	-0.00983372	-0.00585915	-0.00930046	-0.00186602	0.2964	0.0197677	0.0313781	0.00629561
Conventional	Water	1-Nitropyrene	2.43482	-0.00262894	-0.00640102	-0.0337363	0.00981044	0.2964	0.0215959	0.11382	-0.0330986
Conventional	Water	1-Nitropyrene	4.53503	-0.00783951	-0.0355524	-0.084499	-0.00712479	0.2964	0.119947	0.285084	0.0240377
Conventional	Water	1-Nitropyrene	8.83884	-0.00245972	-0.0217411	-0.030651	-0.0140283	0.2964	0.0733504	0.103411	0.0473288
Gnotobiotic	Water	1-Nitropyrene	0.357706	-0.108111	-0.0386721	-0.0444555	-0.0332518	0.2964	0.130473	0.149985	0.112185
Gnotobiotic	Water	1-Nitropyrene	0.57177	-0.0841637	-0.0481223	-0.0512856	-0.0449343	0.2964	0.162356	0.173028	0.1516
Gnotobiotic	Water	1-Nitropyrene	2.34666	-0.0502361	-0.117887	-0.124718	-0.111342	0.2964	0.39773	0.420775	0.375646
Gnotobiotic	Water	1-Nitropyrene	4.30676	-0.0447374	-0.192673	-0.213852	-0.165898	0.2964	0.650045	0.721497	0.559709
Gnotobiotic	Water	1-Nitropyrene	8.89708	-0.0262076	-0.233171	-0.269034	-0.191688	0.2964	0.786677	0.90767	0.646721
Conventional	Corn oil	Benzo[a]Pyrene	0.524469	-0.0792685	-0.0415739	-0.0482577	-0.0355679	0.2964	0.140263	0.162813	0.12
Conventional	Corn oil	Benzo[a]Pyrene	0.89829	-0.0459726	-0.0412968	-0.0529637	-0.0284627	0.2964	0.139328	0.17869	0.0960279
Conventional	Corn oil	Benzo[a]Pyrene	6.4629	-0.0356815	-0.230606	-0.275026	-0.188271	0.2964	0.778022	0.927888	0.635191
Conventional	Corn oil	Benzo[a]Pyrene	10.4155	-0.0240345	-0.25033	-0.289482	-0.212331	0.2964	0.844569	0.97666	0.716368
Conventional	Corn oil	Benzo[a]Pyrene	20.6125	-0.0141243	-0.291137	-0.304544	-0.276898	0.2964	0.982245	1.02748	0.934204
Gnotobiotic	Corn oil	Benzo[a]Pyrene	0.542921	-0.0410439	-0.0222836	-0.026897	-0.0150498	0.2964	0.0751808	0.0907456	0.0507752
Gnotobiotic	Corn oil	Benzo[a]Pyrene	0.863441	-0.0638023	-0.0550895	-0.0629713	-0.0460897	0.2964	0.185862	0.212454	0.155498
Gnotobiotic	Corn oil	Benzo[a]Pyrene	5.80455	-0.0222645	-0.129236	-0.158567	-0.111013	0.2964	0.436017	0.534976	0.374538
Gnotobiotic	Corn oil	Benzo[a]Pyrene	10.3958	-0.0144798	-0.150529	-0.180433	-0.124292	0.2964	0.507858	0.608749	0.419338
Gnotobiotic	Corn oil	Benzo[a]Pyrene	20.4445	-0.00714492	-0.146075	-0.193343	-0.0997801	0.2964	0.492829	0.652304	0.33664
Conventional	Corn oil	1-Nitropyrene	0.436978	0.017212	0.00752128	-0.00304804	0.0144388	0.2964	-0.0253754	0.0102835	-0.0487141
Conventional	Corn oil	1-Nitropyrene	0.859156	-0.0427926	-0.0367655	-0.0470517	-0.0265938	0.2964	0.12404	0.158744	0.0897226
Conventional	Corn oil	1-Nitropyrene	3.43481	-0.0499844	-0.171687	-0.183713	-0.160684	0.2964	0.57924	0.619814	0.542118
Conventional	Corn oil	1-Nitropyrene	6.53504	-0.0587056	-0.383643	-0.475379	-0.305045	0.2964	1.29434	1.60384	1.02917
Conventional	Corn oil	1-Nitropyrene	9.83892	-0.0299402	-0.29458	-0.393859	-0.210116	0.2964	0.993858	1.32881	0.708894
Gnotobiotic	Corn oil	1-Nitropyrene	0.424371	-0.0833402	-0.0353672	-0.048671	-0.0265039	0.2964	0.119322	0.164207	0.0894195
Gnotobiotic	Corn oil	1-Nitropyrene	0.838437	-0.108369	-0.0908608	-0.10784	-0.0737692	0.2964	0.306548	0.363831	0.248884
Gnotobiotic	Corn oil	1-Nitropyrene	2.34666	-0.0494577	-0.116061	-0.120549	-0.111694	0.2964	0.391568	0.406711	0.376837
Gnotobiotic	Corn oil	1-Nitropyrene	5.93373	-0.0287155	-0.17039	-0.370464	-0.039767	0.2964	0.574865	1.24988	0.134167
Gnotobiotic	Corn oil	1-Nitropyrene	9.38113	-0.0286163	-0.268454	-0.581051	-0.0984777	0.2964	0.905714	1.96036	0.332246
Conventional	Benzo[a]pyrene	Benzo[a]Pyrene	0.524469	-0.179415	-0.0940977	-0.104062	-0.0872717	0.2964	0.317469	0.351085	0.294439
Conventional	Benzo[a]pyrene	Benzo[a]Pyrene	1.17591	-0.118508	-0.139354	-0.155153	-0.125338	0.2964	0.470155	0.523459	0.422868
Conventional	Benzo[a]pyrene	Benzo[a]Pyrene	5.46511	-0.0530147	-0.289731	-0.350645	-0.228142	0.2964	0.977501	1.18301	0.76971
Conventional	Benzo[a]pyrene	Benzo[a]Pyrene	10.185	-0.0350103	-0.356581	-0.368533	-0.343696	0.2964	1.20304	1.24336	1.15957
Conventional	Benzo[a]pyrene	Benzo[a]Pyrene	20.2289	-0.0202655	-0.409949	-0.49031	-0.345662	0.2964	1.38309	1.65422	1.1662
Gnotobiotic	Benzo[a]pyrene	Benzo[a]Pyrene	0.542915	-0.154981	-0.0841414	-0.108589	-0.0651164	0.2964	0.283878	0.366359	0.219691
Gnotobiotic	Benzo[a]pyrene	Benzo[a]Pyrene	0.917254	-0.0936551	-0.0859056	-0.100531	-0.0730567	0.2964	0.28983	0.339175	0.24648
Gnotobiotic	Benzo[a]pyrene	Benzo[a]Pyrene	6.43197	-0.0332137	-0.213629	-0.268387	-0.158955	0.2964	0.720747	0.905489	0.536286
Gnotobiotic	Benzo[a]pyrene	Benzo[a]Pyrene	10.2941	-0.0210348	-0.216534	-0.328593	-0.142809	0.2964	0.730546	1.10861	0.481813
Gnotobiotic	Benzo[a]pyrene	Benzo[a]Pyrene	20.5054	-0.0129216	-0.264963	-0.330463	-0.190342	0.2964	0.893936	1.11492	0.64218
Conventional	1-Nitropyrene	1-Nitropyrene	0.436978	0.017212	0.00752128	-0.00357212	0.0144388	0.2964	-0.0253754	0.0120517	-0.0487141
Conventional	1-Nitropyrene	1-Nitropyrene	0.859156	-0.0427926	-0.0367655	-0.0470517	-0.0270529	0.2964	0.12404	0.158744	0.0912718
Conventional	1-Nitropyrene	1-Nitropyrene	3.43481	-0.0499844	-0.171687	-0.183698	-0.160764	0.2964	0.57924	0.619764	0.542389
Conventional	1-Nitropyrene	1-Nitropyrene	6.53504	-0.0587056	-0.383643	-0.479728	-0.308695	0.2964	1.29434	1.61852	1.04148
Conventional	1-Nitropyrene	1-Nitropyrene	9.83892	-0.0299402	-0.29458	-0.393337	-0.211591	0.2964	0.993858	1.32705	0.713871
Gnotobiotic	1-Nitropyrene	1-Nitropyrene	0.424371	-0.0833402	-0.0353672	-0.0485388	-0.0265039	0.2964	0.119322	0.163761	0.0894195
Gnotobiotic	1-Nitropyrene	1-Nitropyrene	0.838437	-0.108369	-0.0908608	-0.108181	-0.0737692	0.2964	0.306548	0.364983	0.248884
Gnotobiotic	1-Nitropyrene	1-Nitropyrene	2.34666	-0.0494577	-0.116061	-0.121955	-0.111694	0.2964	0.391568	0.411454	0.376837
Gnotobiotic	1-Nitropyrene	1-Nitropyrene	5.93373	-0.0287155	-0.17039	-0.331984	-0.039767	0.2964	0.574865	1.12005	0.134167
Gnotobiotic	1-Nitropyrene	1-Nitropyrene	9.38113	-0.0286163	-0.268454	-0.590599	-0.0969382	0.2964	0.905714	1.99257	0.327052
